# Supplementary material
Source: publisher figshare collection journal article supplement (https://acs.figshare.com/ndownloader/files/5333164)
Supplement: Supplementary file 1 [file 5333164]

# **A New Approach for Removing Anionic Organic Dyes from Wastewater Based on Electrostatically Driven Assembly**

*Sira Sansuk, Somkiat Srijaranai, and Supalax Srijaranai\**

Materials Chemistry Research Center, Department of Chemistry and Center of Excellence for Innovation in Chemistry, Faculty of Science, Khon Kaen University, Khon Kaen 40002, Thailand

**Summary:** Number of Pages = 2

Number of Figures = 2

Number of Table = 0

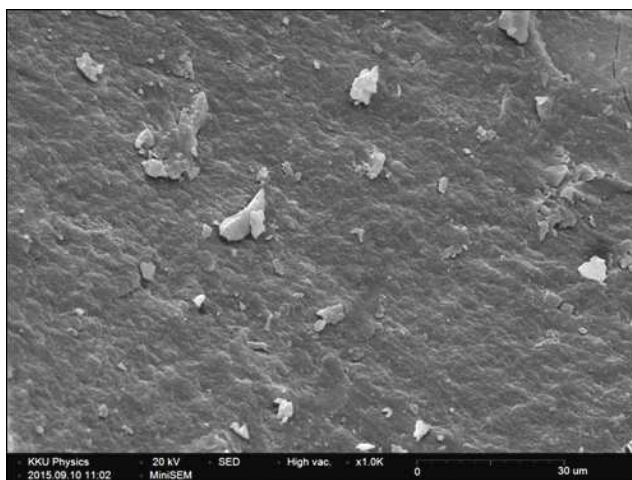

**Figure S1.** SEM image of  $\text{Cl}^-$ -LDH precipitate.

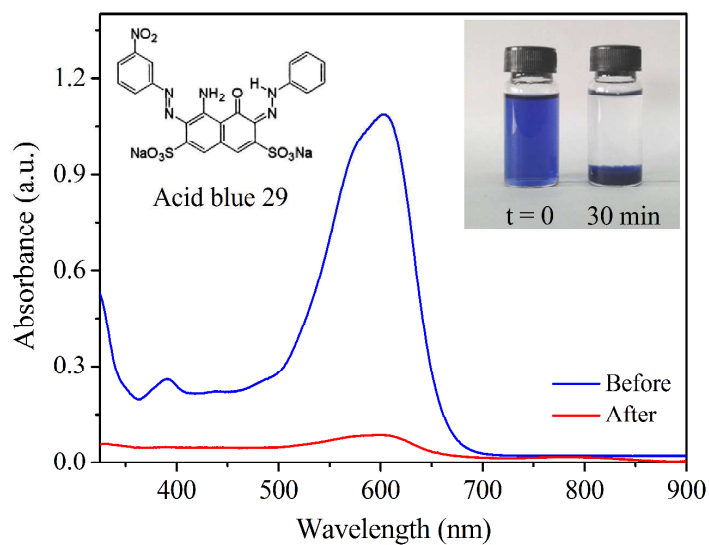

**Figure S2.** UV-vis spectra with corresponding photo image (Inset) of an azo dye, acid blue 29 (AB29), at an initial concentration of  $100 \text{ mg L}^{-1}$  before (blue solid line) and after 30 min removal time (red solid line) by using  $\text{NO}_3^-$ -LDH as sorbent.
